# Supplementary material
Source: PubMed Central journal article supplement (PMC3368654)
Supplement: cn100008c_si_002.pdf [file cn100008c_si_002.pdf]

## SUPPLEMENTARY MATERIAL

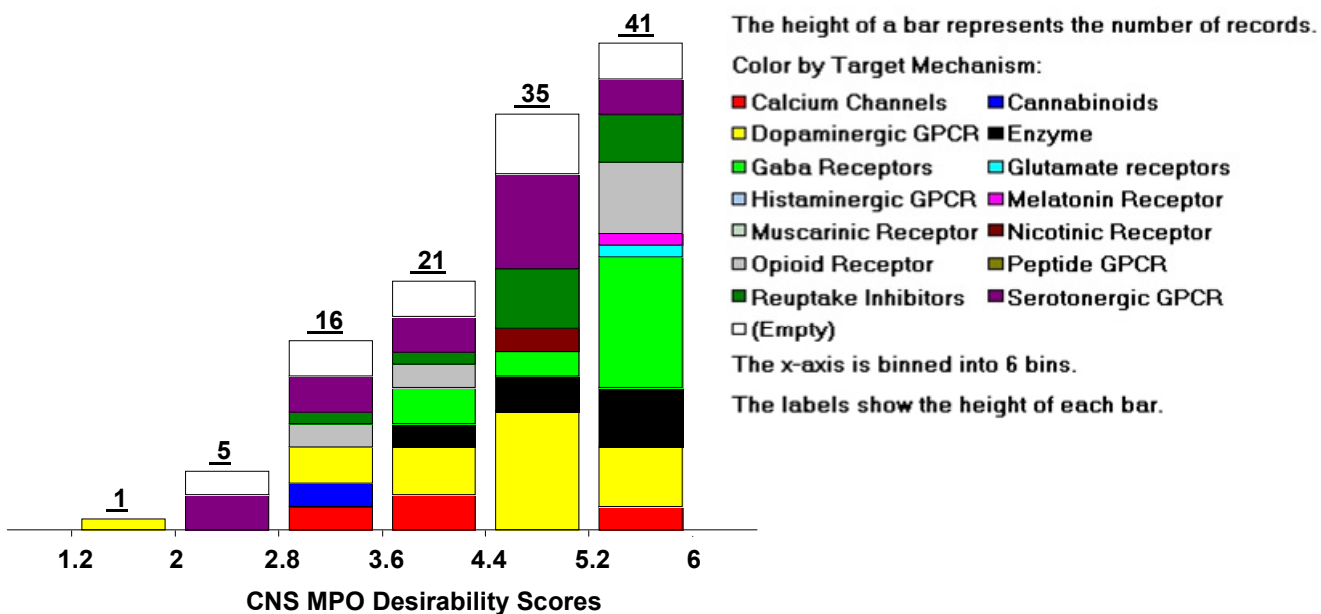

**Figure 1S.** CNS drugs were chemically diverse and represented a range of mechanistic classes including GPCRs, enzymes, ion channels, and transporters.
