# Supplementary material
Source: PubMed Central journal article supplement (PMC3368654)
Supplement: cn100008c_si_003.pdf [file cn100008c_si_003.pdf]

Moving Beyond Rules: The Development of a Central Nervous System Multi-Parameter Optimization (CNS MPO) Approach to Enable Alignment of Drug-Like Properties

Travis T. Wager, *et. al*

| Pub-Name           | Set   | Target Mechanism    | MW    | CLOGP | TPSA  | CLOGD | HBD | PKA  | T0_MW | T0_HBD | T0_CLOGP | T0_LOGD | T0_PSA | T0_BASIC1<br>PKA | CNS<br>MPO |
|--------------------|-------|---------------------|-------|-------|-------|-------|-----|------|-------|--------|----------|---------|--------|------------------|------------|
| Acamprosate        | Drugs | Glutamate receptors | 181.2 | -2.5  | 83.5  | -6.1  | 2   | 1.0  | 1.00  | 0.50   | 1.00     | 1.00    | 1.00   | 1.00             | 5.5        |
| Alprazolam         | Drugs | Gaba Receptors      | 308.8 | 2.6   | 43.1  | 2.5   | 0   | 1.9  | 1.00  | 1.00   | 1.00     | 0.75    | 1.00   | 1.00             | 5.8        |
| Amfebutamone       | Drugs | Dopaminergic GPCR   | 239.7 | 3.2   | 29.1  | 3.3   | 1   | 7.2  | 1.00  | 0.83   | 0.89     | 0.37    | 0.46   | 1.00             | 4.5        |
| Amisulpride        | Drugs | Dopaminergic GPCR   | 369.5 | 1.8   | 101.7 | -0.2  | 3   | 9.0  | 0.93  | 0.17   | 1.00     | 1.00    | 0.61   | 0.52             | 4.2        |
| Amphetamine        | Drugs | Reuptake Inhibitors | 135.2 | 1.7   | 26.0  | -0.6  | 2   | 9.9  | 1.00  | 0.50   | 1.00     | 1.00    | 0.30   | 0.03             | 3.8        |
| Aniracetam         | Drugs |                     | 219.2 | 0.7   | 46.6  | 0.3   | 0   | 1.0  | 1.00  | 1.00   | 1.00     | 1.00    | 1.00   | 1.00             | 6.0        |
| Apomorphine        | Drugs | Dopaminergic GPCR   | 267.3 | 2.5   | 43.7  | 2.5   | 2   | 7.9  | 1.00  | 0.50   | 1.00     | 0.75    | 1.00   | 1.00             | 5.2        |
| Aprepitant         | Drugs |                     | 534.4 | 4.6   | 83.2  | 4.1   | 2   | 4.0  | 0.00  | 0.50   | 0.20     | 0.00    | 1.00   | 1.00             | 2.7        |
| Aripiprazole       | Drugs | Dopaminergic GPCR   | 448.4 | 5.3   | 44.8  | 5.5   | 1   | 6.7  | 0.37  | 0.83   | 0.00     | 0.00    | 1.00   | 1.00             | 3.2        |
| Atomoxetine        | Drugs | Reuptake Inhibitors | 255.4 | 3.9   | 21.3  | 0.7   | 1   | 10.1 | 1.00  | 0.83   | 0.53     | 1.00    | 0.06   | 0.00             | 3.4        |
| Bromazepam         | Drugs | Gaba Receptors      | 316.2 | 1.7   | 54.4  | 2.1   | 1   | 2.0  | 1.00  | 0.83   | 1.00     | 0.97    | 1.00   | 1.00             | 5.8        |
| Bromocriptine      | Drugs | Dopaminergic GPCR   | 654.6 | 6.6   | 118.2 | 5.1   | 3   | 6.7  | 0.00  | 0.17   | 0.00     | 0.00    | 0.06   | 1.00             | 1.2        |
| Brotizolam         | Drugs | Gaba Receptors      | 393.7 | 2.7   | 43.1  | 2.3   | 0   | 2.2  | 0.76  | 1.00   | 1.00     | 0.83    | 1.00   | 1.00             | 5.6        |
| Budipine           | Drugs | Calcium Channels    | 293.4 | 5.6   | 3.2   | 2.4   | 0   | 9.7  | 1.00  | 1.00   | 0.00     | 0.81    | 0.00   | 0.14             | 3.0        |
| Buprenorphine      | Drugs | Opioid Receptor     | 467.6 | 4.0   | 62.2  | 2.5   | 2   | 8.3  | 0.23  | 0.50   | 0.51     | 0.77    | 1.00   | 0.85             | 3.9        |
| Buspirone          | Drugs | Serotonergic GPCR   | 385.5 | 2.2   | 69.6  | 3.4   | 0   | 6.7  | 0.82  | 1.00   | 1.00     | 0.32    | 1.00   | 1.00             | 5.1        |
| Cabergoline        | Drugs | Dopaminergic GPCR   | 451.6 | 4.2   | 71.7  | 0.0   | 2   | 9.4  | 0.35  | 0.50   | 0.41     | 1.00    | 1.00   | 0.30             | 3.6        |
| Caffeine           | Drugs | Serotonergic GPCR   | 194.2 | 0.0   | 61.8  | -0.1  | 0   | 1.0  | 1.00  | 1.00   | 1.00     | 1.00    | 1.00   | 1.00             | 6.0        |
| Carbamazepine      | Drugs | Reuptake Inhibitors | 236.3 | 2.4   | 46.3  | 2.7   | 2   | 1.0  | 1.00  | 0.50   | 1.00     | 0.67    | 1.00   | 1.00             | 5.2        |
| Carisoprodol       | Drugs |                     | 260.3 | 2.3   | 90.7  | 2.2   | 3   | 1.0  | 1.00  | 0.17   | 1.00     | 0.93    | 0.98   | 1.00             | 5.1        |
| Chlorpromazine     | Drugs | Dopaminergic GPCR   | 318.9 | 5.3   | 6.5   | 2.9   | 0   | 9.4  | 1.00  | 1.00   | 0.00     | 0.57    | 0.00   | 0.30             | 2.9        |
| Citalopram         | Drugs | Serotonergic GPCR   | 324.4 | 3.1   | 36.3  | 0.4   | 0   | 9.6  | 1.00  | 1.00   | 0.93     | 1.00    | 0.81   | 0.22             | 5.0        |
| Clomipramine       | Drugs | Serotonergic GPCR   | 314.9 | 5.9   | 6.5   | 3.5   | 0   | 9.5  | 1.00  | 1.00   | 0.00     | 0.23    | 0.00   | 0.27             | 2.5        |
| Clonazepam         | Drugs | Gaba Receptors      | 315.7 | 2.4   | 84.6  | 2.3   | 1   | 1.6  | 1.00  | 0.83   | 1.00     | 0.83    | 1.00   | 1.00             | 5.7        |
| Clozapine          | Drugs | Serotonergic GPCR   | 326.8 | 3.7   | 30.9  | 3.4   | 1   | 7.1  | 1.00  | 0.83   | 0.64     | 0.33    | 0.54   | 1.00             | 4.3        |
| Cyclobenzaprine    | Drugs |                     | 275.4 | 5.1   | 3.2   | 3.3   | 0   | 9.2  | 1.00  | 1.00   | 0.00     | 0.37    | 0.00   | 0.43             | 2.8        |
| Dexmethylphenidate | Drugs | Dopaminergic GPCR   | 233.3 | 2.6   | 38.3  | -0.3  | 1   | 10.6 | 1.00  | 0.83   | 1.00     | 1.00    | 0.92   | 0.00             | 4.7        |
| Dextropropoxyphene | Drugs | Opioid Receptor     | 339.5 | 5.2   | 29.5  | 3.7   | 0   | 9.2  | 1.00  | 1.00   | 0.00     | 0.17    | 0.48   | 0.41             | 3.1        |
| Diazepam           | Drugs | Gaba Receptors      | 284.7 | 3.0   | 32.7  | 3.0   | 0   | 3.4  | 1.00  | 1.00   | 1.00     | 0.52    | 0.63   | 1.00             | 5.2        |
| Donepezil          | Drugs | Enzyme              | 379.5 | 4.6   | 38.8  | 3.3   | 0   | 8.8  | 0.86  | 1.00   | 0.20     | 0.35    | 0.94   | 0.60             | 4.0        |
| Dronabinol         | Drugs | Cannabinoids        | 314.5 | 7.2   | 29.5  | 7.7   | 1   | 1.0  | 1.00  | 0.83   | 0.00     | 0.00    | 0.47   | 1.00             | 3.3        |

Moving Beyond Rules: The Development of a Central Nervous System Multi-Parameter Optimization (CNS MPO) Approach to Enable Alignment of Drug-Like Properties

Travis T. Wager, *et. al*

| Pub-Name             | Set   | Target Mechanism    | MW    | CLOGP | TPSA  | CLOGD | HBD | PKA  | T0_MW | T0_HBD | T0_CLOGP | T0_LOGD | T0_PSA | T0_BASIC1<br>PKA | CNS<br>MPO |
|----------------------|-------|---------------------|-------|-------|-------|-------|-----|------|-------|--------|----------|---------|--------|------------------|------------|
| Duloxetine           | Drugs | Serotonergic GPCR   | 297.4 | 4.3   | 21.3  | 1.2   | 1   | 10.0 | 1.00  | 0.83   | 0.37     | 1.00    | 0.06   | 0.00             | 3.3        |
| Eletriptan           | Drugs | Serotonergic GPCR   | 382.5 | 3.4   | 53.2  | 0.3   | 1   | 10.4 | 0.84  | 0.83   | 0.82     | 1.00    | 1.00   | 0.00             | 4.5        |
| Escitalopram         | Drugs | Serotonergic GPCR   | 324.4 | 3.1   | 36.3  | 0.4   | 0   | 9.6  | 1.00  | 1.00   | 0.93     | 1.00    | 0.81   | 0.22             | 5.0        |
| Eszopiclone          | Drugs | Gaba Receptors      | 388.8 | 1.3   | 91.8  | 0.7   | 0   | 6.8  | 0.79  | 1.00   | 1.00     | 1.00    | 0.94   | 1.00             | 5.7        |
| Ethosuximide         | Drugs | Calcium Channels    | 141.2 | 0.4   | 46.2  | 0.4   | 1   | 1.0  | 1.00  | 0.83   | 1.00     | 1.00    | 1.00   | 1.00             | 5.8        |
| Felbamate            | Drugs | Gaba Receptors      | 238.2 | 0.5   | 104.6 | 1.2   | 4   | 1.0  | 1.00  | 0.00   | 1.00     | 1.00    | 0.51   | 1.00             | 4.5        |
| Fentanyl             | Drugs | Opioid Receptor     | 336.5 | 3.6   | 23.6  | 2.5   | 0   | 9.1  | 1.00  | 1.00   | 0.69     | 0.74    | 0.18   | 0.47             | 4.1        |
| Flumazenil           | Drugs | Gaba Receptors      | 303.3 | 1.3   | 64.4  | 0.9   | 0   | 1.1  | 1.00  | 1.00   | 1.00     | 1.00    | 1.00   | 1.00             | 6.0        |
| Fluoxetine           | Drugs | Serotonergic GPCR   | 309.3 | 4.6   | 21.3  | 1.6   | 1   | 10.1 | 1.00  | 0.83   | 0.22     | 1.00    | 0.06   | 0.00             | 3.1        |
| Fluvoxamine          | Drugs | Serotonergic GPCR   | 318.3 | 3.3   | 56.8  | 1.2   | 2   | 9.4  | 1.00  | 0.50   | 0.84     | 1.00    | 1.00   | 0.31             | 4.6        |
| Gabapentin           | Drugs | Calcium Channels    | 171.2 | -0.7  | 63.3  | -1.3  | 3   | 10.3 | 1.00  | 0.17   | 1.00     | 1.00    | 1.00   | 0.00             | 4.2        |
| Galantamine          | Drugs | Enzyme              | 287.4 | 1.0   | 41.9  | 1.1   | 1   | 7.9  | 1.00  | 0.83   | 1.00     | 1.00    | 1.00   | 1.00             | 5.8        |
| Haloperidol          | Drugs | Dopaminergic GPCR   | 375.9 | 3.8   | 40.5  | 2.1   | 1   | 8.3  | 0.89  | 0.83   | 0.58     | 0.98    | 1.00   | 0.88             | 5.1        |
| Hydrocodone          | Drugs | Opioid Receptor     | 299.4 | 1.1   | 38.8  | 0.7   | 0   | 8.5  | 1.00  | 1.00   | 1.00     | 1.00    | 0.94   | 0.74             | 5.7        |
| Indeloxazine         | Drugs | Reuptake Inhibitors | 231.3 | 2.2   | 30.5  | 0.4   | 1   | 8.5  | 1.00  | 0.83   | 1.00     | 1.00    | 0.52   | 0.77             | 5.1        |
| Lamotrigine          | Drugs | Reuptake Inhibitors | 256.1 | 2.5   | 90.7  | -0.2  | 4   | 5.4  | 1.00  | 0.00   | 1.00     | 1.00    | 0.98   | 1.00             | 5.0        |
| Levetiracetam        | Drugs | Calcium Channels    | 170.2 | -0.3  | 63.4  | -0.7  | 2   | 1.0  | 1.00  | 0.50   | 1.00     | 1.00    | 1.00   | 1.00             | 5.5        |
| Levomethadyl Acetate | Drugs | Opioid Receptor     | 353.5 | 4.6   | 29.5  | 3.5   | 0   | 9.4  | 1.00  | 1.00   | 0.21     | 0.26    | 0.48   | 0.30             | 3.2        |
| Lofexidine           | Drugs |                     | 259.1 | 3.5   | 33.6  | 1.7   | 1   | 9.8  | 1.00  | 0.83   | 0.77     | 1.00    | 0.68   | 0.10             | 4.4        |
| Lorazepam            | Drugs | Gaba Receptors      | 321.2 | 2.4   | 61.7  | 2.5   | 2   | 1.0  | 1.00  | 0.50   | 1.00     | 0.77    | 1.00   | 1.00             | 5.3        |
| Meprobamate          | Drugs |                     | 218.3 | 0.9   | 104.6 | 0.7   | 4   | 1.0  | 1.00  | 0.00   | 1.00     | 1.00    | 0.51   | 1.00             | 4.5        |
| Methylphenidate      | Drugs | Dopaminergic GPCR   | 233.3 | 2.6   | 38.3  | -0.3  | 1   | 10.6 | 1.00  | 0.83   | 1.00     | 1.00    | 0.92   | 0.00             | 4.7        |
| Metoclopramide       | Drugs |                     | 299.8 | 2.2   | 67.6  | 0.0   | 3   | 9.7  | 1.00  | 0.17   | 1.00     | 1.00    | 1.00   | 0.18             | 4.3        |
| Midazolam            | Drugs | Gaba Receptors      | 325.8 | 3.4   | 30.2  | 3.9   | 0   | 5.6  | 1.00  | 1.00   | 0.79     | 0.04    | 0.51   | 1.00             | 4.3        |
| Milnacipran          | Drugs | Serotonergic GPCR   | 246.3 | 1.9   | 46.3  | -1.5  | 2   | 10.4 | 1.00  | 0.50   | 1.00     | 1.00    | 1.00   | 0.00             | 4.5        |
| Minaprine            | Drugs | Enzyme              | 298.4 | 3.2   | 50.3  | 1.2   | 1   | 7.1  | 1.00  | 0.83   | 0.91     | 1.00    | 1.00   | 1.00             | 5.7        |
| Mirtazapine          | Drugs |                     | 265.4 | 2.8   | 19.4  | 2.1   | 0   | 8.1  | 1.00  | 1.00   | 1.00     | 0.95    | 0.00   | 0.95             | 4.9        |
| Moclobemide          | Drugs | Enzyme              | 268.7 | 2.2   | 41.6  | 0.7   | 1   | 6.9  | 1.00  | 0.83   | 1.00     | 1.00    | 1.00   | 1.00             | 5.8        |
| Modafinil            | Drugs | Dopaminergic GPCR   | 273.4 | 0.9   | 60.2  | 1.2   | 2   | 1.0  | 1.00  | 0.50   | 1.00     | 1.00    | 1.00   | 1.00             | 5.5        |
| Morphine             | Drugs | Opioid Receptor     | 285.3 | 0.6   | 52.9  | -0.4  | 2   | 8.3  | 1.00  | 0.50   | 1.00     | 1.00    | 1.00   | 0.88             | 5.4        |
| Nalmefene            | Drugs | Opioid Receptor     | 339.4 | 2.6   | 52.9  | 2.1   | 2   | 7.7  | 1.00  | 0.50   | 1.00     | 0.96    | 1.00   | 1.00             | 5.5        |

Moving Beyond Rules: The Development of a Central Nervous System Multi-Parameter Optimization (CNS MPO) Approach to Enable Alignment of Drug-Like Properties

Travis T. Wager, *et. al*

| Pub-Name      | Set   | Target Mechanism    | MW    | CLOGP | TPSA  | CLOGD | HBD | PKA  | T0_MW | T0_HBD | T0_CLOGP | T0_LOGD | T0_PSA | T0_BASIC1<br>PKA | CNS<br>MPO |
|---------------|-------|---------------------|-------|-------|-------|-------|-----|------|-------|--------|----------|---------|--------|------------------|------------|
| Naltrexone    | Drugs | Opioid Receptor     | 341.4 | 0.4   | 70.0  | 1.4   | 2   | 7.5  | 1.00  | 0.50   | 1.00     | 1.00    | 1.00   | 1.00             | 5.5        |
| Nemonapride   | Drugs | Dopaminergic GPCR   | 387.9 | 4.2   | 53.6  | 2.0   | 2   | 8.4  | 0.80  | 0.50   | 0.40     | 0.99    | 1.00   | 0.82             | 4.5        |
| Nicergoline   | Drugs |                     | 484.4 | 4.1   | 56.6  | 3.8   | 0   | 7.8  | 0.11  | 1.00   | 0.46     | 0.10    | 1.00   | 1.00             | 3.7        |
| Nicotrol      | Drugs | Nicotinic Receptor  | 162.2 | 0.9   | 16.1  | -0.5  | 0   | 8.0  | 1.00  | 1.00   | 1.00     | 1.00    | 0.00   | 1.00             | 5.0        |
| Nimodipine    | Drugs | Calcium Channels    | 418.4 | 4.0   | 117.0 | 3.9   | 1   | 2.8  | 0.58  | 0.83   | 0.50     | 0.08    | 0.10   | 1.00             | 3.1        |
| Nortriptyline | Drugs |                     | 263.4 | 4.3   | 12.0  | 3.2   | 1   | 10.0 | 1.00  | 0.83   | 0.34     | 0.42    | 0.00   | 0.00             | 2.6        |
| Olanzapine    | Drugs | Dopaminergic GPCR   | 312.4 | 3.0   | 30.9  | 2.5   | 1   | 7.8  | 1.00  | 0.83   | 1.00     | 0.75    | 0.54   | 1.00             | 5.1        |
| Oxcarbazepine | Drugs | Reuptake Inhibitors | 252.3 | 1.2   | 63.4  | 1.3   | 2   | 1.0  | 1.00  | 0.50   | 1.00     | 1.00    | 1.00   | 1.00             | 5.5        |
| Oxycodone     | Drugs | Opioid Receptor     | 315.4 | 0.0   | 59.0  | 1.2   | 1   | 7.6  | 1.00  | 0.83   | 1.00     | 1.00    | 1.00   | 1.00             | 5.8        |
| Paliperidone  | Drugs | Dopaminergic GPCR   | 426.5 | 1.1   | 84.4  | 1.0   | 1   | 7.9  | 0.53  | 0.83   | 1.00     | 1.00    | 1.00   | 1.00             | 5.4        |
| Paroxetine    | Drugs | Serotonergic GPCR   | 329.4 | 4.2   | 39.7  | 1.2   | 1   | 10.3 | 1.00  | 0.83   | 0.38     | 1.00    | 0.99   | 0.00             | 4.2        |
| Pergolide     | Drugs | Dopaminergic GPCR   | 314.5 | 4.4   | 19.0  | 2.2   | 1   | 9.7  | 1.00  | 0.83   | 0.30     | 0.92    | 0.00   | 0.17             | 3.2        |
| Perospirone   | Drugs | Dopaminergic GPCR   | 426.6 | 3.8   | 56.8  | 2.4   | 0   | 8.4  | 0.52  | 1.00   | 0.62     | 0.82    | 1.00   | 0.80             | 4.8        |
| phenytoin     | Drugs | Reuptake Inhibitors | 252.3 | 2.1   | 58.2  | 2.5   | 2   | 1.0  | 1.00  | 0.50   | 1.00     | 0.76    | 1.00   | 1.00             | 5.3        |
| Piracetam     | Drugs |                     | 142.2 | -1.2  | 63.4  | -1.6  | 2   | 1.0  | 1.00  | 0.50   | 1.00     | 1.00    | 1.00   | 1.00             | 5.5        |
| Pramipexole   | Drugs | Dopaminergic GPCR   | 211.3 | 1.2   | 50.9  | -0.5  | 3   | 9.5  | 1.00  | 0.17   | 1.00     | 1.00    | 1.00   | 0.27             | 4.4        |
| Pregabalin    | Drugs | Calcium Channels    | 159.2 | -0.9  | 63.3  | -1.4  | 3   | 11.3 | 1.00  | 0.17   | 1.00     | 1.00    | 1.00   | 0.00             | 4.2        |
| Propofol      | Drugs |                     | 178.3 | 3.9   | 20.2  | 4.2   | 1   | 1.0  | 1.00  | 0.83   | 0.54     | 0.00    | 0.01   | 1.00             | 3.4        |
| Propoxyphene  | Drugs |                     | 339.5 | 5.2   | 29.5  | 3.7   | 0   | 9.2  | 1.00  | 1.00   | 0.00     | 0.17    | 0.48   | 0.41             | 3.1        |
| Quazepam      | Drugs | Gaba Receptors      | 386.8 | 3.2   | 15.6  | 4.1   | 0   | 1.0  | 0.81  | 1.00   | 0.90     | 0.00    | 0.00   | 1.00             | 3.7        |
| Quetiapine    | Drugs | Serotonergic GPCR   | 383.5 | 3.0   | 48.3  | 1.6   | 1   | 5.8  | 0.83  | 0.83   | 1.00     | 1.00    | 1.00   | 1.00             | 5.7        |
| Ramelteon     | Drugs | Melatonin Receptor  | 259.3 | 2.5   | 38.3  | 2.6   | 1   | 1.0  | 1.00  | 0.83   | 1.00     | 0.72    | 0.92   | 1.00             | 5.5        |
| Rasagiline    | Drugs | Enzyme              | 171.2 | 2.5   | 12.0  | 1.9   | 1   | 7.5  | 1.00  | 0.83   | 1.00     | 1.00    | 0.00   | 1.00             | 4.8        |
| Reboxetine    | Drugs | Reuptake Inhibitors | 313.4 | 3.3   | 39.7  | 1.8   | 1   | 8.4  | 1.00  | 0.83   | 0.87     | 1.00    | 0.99   | 0.82             | 5.5        |
| Remifentanyl  | Drugs | Opioid Receptor     | 376.4 | 2.0   | 76.2  | 2.0   | 0   | 6.6  | 0.88  | 1.00   | 1.00     | 0.98    | 1.00   | 1.00             | 5.9        |
| Riluzole      | Drugs | Reuptake Inhibitors | 234.2 | 3.2   | 48.1  | 2.8   | 2   | 3.6  | 1.00  | 0.50   | 0.88     | 0.58    | 1.00   | 1.00             | 5.0        |
| Rimonabant    | Drugs | Cannabinoids        | 463.8 | 6.5   | 50.2  | 6.0   | 1   | 3.2  | 0.26  | 0.83   | 0.00     | 0.00    | 1.00   | 1.00             | 3.1        |
| Risperidone   | Drugs | Dopaminergic GPCR   | 410.5 | 2.7   | 64.2  | 2.3   | 0   | 7.9  | 0.64  | 1.00   | 1.00     | 0.86    | 1.00   | 1.00             | 5.5        |
| Rivastigmine  | Drugs | Enzyme              | 250.3 | 2.1   | 32.8  | 0.9   | 0   | 8.6  | 1.00  | 1.00   | 1.00     | 1.00    | 0.64   | 0.69             | 5.3        |
| Ropinirole    | Drugs | Dopaminergic GPCR   | 260.4 | 2.8   | 32.3  | 1.2   | 1   | 9.5  | 1.00  | 0.83   | 1.00     | 1.00    | 0.62   | 0.28             | 4.7        |
| Ropivacaine   | Drugs |                     | 274.4 | 3.2   | 32.3  | 2.6   | 1   | 8.2  | 1.00  | 0.83   | 0.92     | 0.69    | 0.62   | 0.92             | 5.0        |

Moving Beyond Rules: The Development of a Central Nervous System Multi-Parameter Optimization (CNS MPO) Approach to Enable Alignment of Drug-Like Properties

Travis T. Wager, *et. al*

| Pub-Name      | Set        | Target Mechanism    | MW    | CLOGP | TPSA  | CLOGD | HBD | PKA  | T0_MW | T0_HBD | T0_CLOGP | T0_LOGD | T0_PSA | T0_BASIC1<br>PKA | CNS<br>MPO |
|---------------|------------|---------------------|-------|-------|-------|-------|-----|------|-------|--------|----------|---------|--------|------------------|------------|
| Selegiline    | Drugs      | Enzyme              | 187.3 | 3.0   | 3.2   | 2.6   | 0   | 7.5  | 1.00  | 1.00   | 0.99     | 0.71    | 0.00   | 1.00             | 4.7        |
| Sertindole    | Drugs      | Serotonergic GPCR   | 440.9 | 5.3   | 40.5  | 3.8   | 1   | 9.1  | 0.42  | 0.83   | 0.00     | 0.10    | 1.00   | 0.47             | 2.8        |
| Sertraline    | Drugs      | Serotonergic GPCR   | 306.2 | 5.3   | 12.0  | 2.8   | 1   | 9.5  | 1.00  | 0.83   | 0.00     | 0.62    | 0.00   | 0.27             | 2.7        |
| Sinequan      | Drugs      | Serotonergic GPCR   | 279.4 | 4.1   | 12.5  | 2.1   | 0   | 9.2  | 1.00  | 1.00   | 0.45     | 0.96    | 0.00   | 0.41             | 3.8        |
| Sulpiride     | Drugs      | Dopaminergic GPCR   | 341.4 | 1.1   | 101.7 | -1.4  | 3   | 9.0  | 1.00  | 0.17   | 1.00     | 1.00    | 0.61   | 0.52             | 4.3        |
| Tacrine       | Drugs      | Enzyme              | 198.3 | 3.3   | 38.9  | 1.1   | 2   | 9.6  | 1.00  | 0.50   | 0.86     | 1.00    | 0.95   | 0.18             | 4.5        |
| Talipexole    | Drugs      | Dopaminergic GPCR   | 209.3 | 1.1   | 42.2  | 1.0   | 2   | 7.2  | 1.00  | 0.50   | 1.00     | 1.00    | 1.00   | 1.00             | 5.5        |
| Terguride     | Drugs      | Dopaminergic GPCR   | 340.5 | 2.8   | 51.4  | 1.4   | 2   | 9.8  | 1.00  | 0.50   | 1.00     | 1.00    | 1.00   | 0.11             | 4.6        |
| Thiopental    | Drugs      | Gaba Receptors      | 242.3 | 1.8   | 58.5  | -0.7  | 1   | 1.0  | 1.00  | 0.83   | 1.00     | 1.00    | 1.00   | 1.00             | 5.8        |
| Tiagabine     | Drugs      | Gaba Receptors      | 375.5 | 2.8   | 40.5  | 3.2   | 1   | 9.4  | 0.89  | 0.83   | 1.00     | 0.42    | 1.00   | 0.31             | 4.4        |
| Tianeptine    | Drugs      | Reuptake Inhibitors | 437.0 | 1.5   | 86.7  | 0.4   | 2   | 7.5  | 0.45  | 0.50   | 1.00     | 1.00    | 1.00   | 1.00             | 5.0        |
| Topiramate    | Drugs      | Enzyme              | 339.4 | 0.0   | 115.5 | 3.0   | 2   | 1.0  | 1.00  | 0.50   | 1.00     | 0.52    | 0.15   | 1.00             | 4.2        |
| Tramadol      | Drugs      | Reuptake Inhibitors | 263.4 | 3.1   | 32.7  | 0.5   | 1   | 9.6  | 1.00  | 0.83   | 0.95     | 1.00    | 0.64   | 0.20             | 4.6        |
| Trazodone     | Drugs      | Serotonergic GPCR   | 371.9 | 3.9   | 45.8  | 1.6   | 0   | 6.7  | 0.92  | 1.00   | 0.58     | 1.00    | 1.00   | 1.00             | 5.5        |
| Tropisetron   | Drugs      | Serotonergic GPCR   | 284.4 | 2.9   | 45.3  | 1.0   | 1   | 10.0 | 1.00  | 0.83   | 1.00     | 1.00    | 1.00   | 0.00             | 4.8        |
| Valproic Acid | Drugs      |                     | 144.2 | 2.8   | 37.3  | 0.2   | 1   | 1.0  | 1.00  | 0.83   | 1.00     | 1.00    | 0.87   | 1.00             | 5.7        |
| Varenicline   | Drugs      | Nicotinic Receptor  | 211.3 | 0.9   | 37.8  | -1.3  | 1   | 9.6  | 1.00  | 0.83   | 1.00     | 1.00    | 0.89   | 0.20             | 4.9        |
| Venlafaxine   | Drugs      | Serotonergic GPCR   | 277.4 | 3.3   | 32.7  | 1.2   | 1   | 9.3  | 1.00  | 0.83   | 0.87     | 1.00    | 0.64   | 0.37             | 4.7        |
| Verapamil     | Drugs      | Calcium Channels    | 454.6 | 4.5   | 64.0  | 2.3   | 0   | 9.0  | 0.32  | 1.00   | 0.27     | 0.84    | 1.00   | 0.52             | 3.9        |
| Vigabatrin    | Drugs      | Gaba Receptors      | 129.2 | -2.2  | 63.3  | -2.6  | 3   | 10.6 | 1.00  | 0.17   | 1.00     | 1.00    | 1.00   | 0.00             | 4.2        |
| Vinpocetine   | Drugs      |                     | 350.5 | 4.8   | 34.5  | 4.6   | 0   | 7.8  | 1.00  | 1.00   | 0.09     | 0.00    | 0.72   | 1.00             | 3.8        |
| Zaleplon      | Drugs      | Gaba Receptors      | 305.3 | 1.4   | 74.3  | 0.9   | 0   | 1.0  | 1.00  | 1.00   | 1.00     | 1.00    | 1.00   | 1.00             | 6.0        |
| Ziprasidone   | Drugs      | Dopaminergic GPCR   | 412.9 | 4.2   | 48.5  | 3.1   | 1   | 8.4  | 0.62  | 0.83   | 0.40     | 0.47    | 1.00   | 0.80             | 4.1        |
| Zolpidem      | Drugs      | Gaba Receptors      | 307.4 | 3.0   | 37.6  | 2.9   | 0   | 6.6  | 1.00  | 1.00   | 0.99     | 0.57    | 0.88   | 1.00             | 5.4        |
| Zonisamide    | Drugs      | Enzyme              | 212.2 | -0.4  | 86.2  | -0.1  | 2   | 1.0  | 1.00  | 0.50   | 1.00     | 1.00    | 1.00   | 1.00             | 5.5        |
| Zotepine      | Drugs      | Serotonergic GPCR   | 331.9 | 5.1   | 12.5  | 5.2   | 0   | 8.7  | 1.00  | 1.00   | 0.00     | 0.00    | 0.00   | 0.64             | 2.6        |
| Candidate-001 | Candidates | Glutamate receptors | 276.2 | -0.5  | 112.1 | 0.3   | 2   | 6.9  | 1.00  | 0.50   | 1.00     | 1.00    | 0.26   | 1.00             | 4.8        |
| Candidate-002 | Candidates | Reuptake Inhibitors | 255.3 | 3.7   | 21.3  | 1.7   | 1   | 9.1  | 1.00  | 0.83   | 0.67     | 1.00    | 0.06   | 0.46             | 4.0        |
| Candidate-003 | Candidates | Reuptake Inhibitors | 326.2 | 5.5   | 21.3  | 2.7   | 1   | 10.1 | 1.00  | 0.83   | 0.00     | 0.67    | 0.06   | 0.00             | 2.6        |
| Candidate-004 | Candidates | Serotonergic GPCR   | 391.5 | 2.0   | 78.5  | 0.0   | 2   | 10.3 | 0.78  | 0.50   | 1.00     | 1.00    | 1.00   | 0.00             | 4.3        |
| Candidate-005 | Candidates | Enzyme              | 375.5 | 3.9   | 58.4  | 2.1   | 1   | 8.8  | 0.89  | 0.83   | 0.53     | 0.95    | 1.00   | 0.60             | 4.8        |

Moving Beyond Rules: The Development of a Central Nervous System Multi-Parameter Optimization (CNS MPO) Approach to Enable Alignment of Drug-Like Properties

Travis T. Wager, *et. al*

| Pub-Name      | Set        | Target Mechanism    | MW    | CLOGP | TPSA  | CLOGD | HBD | PKA  | T0_MW | T0_HBD | T0_CLOGP | T0_LOGD | T0_PSA | T0_BASIC1<br>PKA | CNS<br>MPO |
|---------------|------------|---------------------|-------|-------|-------|-------|-----|------|-------|--------|----------|---------|--------|------------------|------------|
| Candidate-006 | Candidates | Peptide GPCR        | 379.5 | 2.6   | 53.6  | 0.2   | 2   | 9.9  | 0.86  | 0.50   | 1.00     | 1.00    | 1.00   | 0.07             | 4.4        |
| Candidate-007 | Candidates | Enzyme              | 311.4 | 4.1   | 51.4  | 2.3   | 2   | 8.7  | 1.00  | 0.50   | 0.44     | 0.85    | 1.00   | 0.67             | 4.5        |
| Candidate-008 | Candidates | Calcium Channels    | 159.2 | -0.8  | 63.3  | -1.1  | 3   | 10.6 | 1.00  | 0.17   | 1.00     | 1.00    | 1.00   | 0.00             | 4.2        |
| Candidate-009 | Candidates | Nicotinic Receptor  | 269.1 | 1.0   | 34.0  | -2.2  | 1   | 10.2 | 1.00  | 0.83   | 1.00     | 1.00    | 0.70   | 0.00             | 4.5        |
| Candidate-010 | Candidates | Opioid Receptor     | 372.5 | 4.7   | 49.4  | 2.3   | 1   | 9.4  | 0.91  | 0.83   | 0.16     | 0.84    | 1.00   | 0.32             | 4.1        |
| Candidate-011 | Candidates | Dopaminergic GPCR   | 436.5 | 3.7   | 87.2  | 3.1   | 1   | 6.6  | 0.45  | 0.83   | 0.66     | 0.45    | 1.00   | 1.00             | 4.4        |
| Candidate-012 | Candidates | Peptide GPCR        | 459.6 | 5.5   | 80.2  | 5.4   | 1   | 5.1  | 0.29  | 0.83   | 0.00     | 0.00    | 1.00   | 1.00             | 3.1        |
| Candidate-013 | Candidates | Enzyme              | 378.5 | 5.3   | 33.2  | 3.0   | 0   | 8.8  | 0.87  | 1.00   | 0.00     | 0.52    | 0.66   | 0.61             | 3.7        |
| Candidate-014 | Candidates | Opioid Receptor     | 396.5 | 3.3   | 45.9  | 1.8   | 0   | 9.9  | 0.74  | 1.00   | 0.84     | 1.00    | 1.00   | 0.07             | 4.6        |
| Candidate-015 | Candidates | Nicotinic Receptor  | 271.3 | 1.7   | 58.4  | -0.9  | 1   | 9.1  | 1.00  | 0.83   | 1.00     | 1.00    | 1.00   | 0.45             | 5.3        |
| Candidate-016 | Candidates | Gaba Receptors      | 336.4 | 2.0   | 61.4  | 2.2   | 0   | 6.2  | 1.00  | 1.00   | 1.00     | 0.91    | 1.00   | 1.00             | 5.9        |
| Candidate-017 | Candidates | Enzyme              | 468.5 | 2.2   | 105.8 | 0.3   | 1   | 5.7  | 0.22  | 0.83   | 1.00     | 1.00    | 0.47   | 1.00             | 4.5        |
| Candidate-018 | Candidates | Cannabinoids        | 436.3 | 5.6   | 38.1  | 4.9   | 0   | 1.0  | 0.46  | 1.00   | 0.00     | 0.00    | 0.91   | 1.00             | 3.4        |
| Candidate-019 | Candidates | Peptide GPCR        | 392.9 | 6.0   | 80.7  | 6.3   | 2   | 4.0  | 0.77  | 0.50   | 0.00     | 0.00    | 1.00   | 1.00             | 3.3        |
| Candidate-020 | Candidates | Glutamate receptors | 402.5 | 3.2   | 66.3  | 2.2   | 1   | 8.1  | 0.70  | 0.83   | 0.90     | 0.90    | 1.00   | 0.96             | 5.3        |
| Candidate-021 | Candidates | Enzyme              | 315.4 | 3.1   | 60.6  | 1.1   | 2   | 8.6  | 1.00  | 0.50   | 0.97     | 1.00    | 1.00   | 0.68             | 5.1        |
| Candidate-022 | Candidates | Enzyme              | 489.6 | 5.6   | 71.0  | 2.1   | 3   | 10.4 | 0.07  | 0.17   | 0.00     | 0.97    | 1.00   | 0.00             | 2.2        |
| Candidate-023 | Candidates | Nicotinic Receptor  | 227.2 | 2.6   | 12.0  | -0.2  | 1   | 10.0 | 1.00  | 0.83   | 1.00     | 1.00    | 0.00   | 0.03             | 3.9        |
| Candidate-024 | Candidates | Calcium Channels    | 187.3 | 0.1   | 63.3  | -0.3  | 3   | 11.2 | 1.00  | 0.17   | 1.00     | 1.00    | 1.00   | 0.00             | 4.2        |
| Candidate-025 | Candidates | Reuptake Inhibitors | 319.8 | 4.5   | 21.3  | 1.5   | 1   | 10.3 | 1.00  | 0.83   | 0.24     | 1.00    | 0.06   | 0.00             | 3.1        |
| Candidate-026 | Candidates | Serotonergic GPCR   | 322.8 | 2.9   | 50.3  | 3.8   | 1   | 7.8  | 1.00  | 0.83   | 1.00     | 0.09    | 1.00   | 1.00             | 4.9        |
| Candidate-027 | Candidates | Serotonergic GPCR   | 447.6 | 4.1   | 57.9  | 1.5   | 0   | 8.7  | 0.37  | 1.00   | 0.46     | 1.00    | 1.00   | 0.65             | 4.5        |
| Candidate-028 | Candidates | Histaminergic GPCR  | 322.4 | 2.4   | 32.3  | 0.0   | 1   | 9.2  | 1.00  | 0.83   | 1.00     | 1.00    | 0.62   | 0.42             | 4.9        |
| Candidate-029 | Candidates | Glutamate receptors | 327.4 | 1.8   | 63.9  | 0.8   | 3   | 8.2  | 1.00  | 0.17   | 1.00     | 1.00    | 1.00   | 0.90             | 5.1        |
| Candidate-030 | Candidates | Peptide GPCR        | 296.4 | 3.4   | 33.3  | 0.8   | 2   | 9.9  | 1.00  | 0.50   | 0.80     | 1.00    | 0.66   | 0.05             | 4.0        |
| Candidate-031 | Candidates | Serotonergic GPCR   | 383.5 | 1.9   | 69.6  | 2.0   | 0   | 6.7  | 0.83  | 1.00   | 1.00     | 1.00    | 1.00   | 1.00             | 5.8        |
| Candidate-032 | Candidates | Gaba Receptors      | 310.4 | 1.1   | 61.4  | 2.3   | 0   | 6.5  | 1.00  | 1.00   | 1.00     | 0.84    | 1.00   | 1.00             | 5.8        |
| Candidate-033 | Candidates | Opioid Receptor     | 426.6 | 3.1   | 69.6  | 0.8   | 2   | 10.3 | 0.52  | 0.50   | 0.95     | 1.00    | 1.00   | 0.00             | 4.0        |
| Candidate-034 | Candidates | Reuptake Inhibitors | 308.4 | 3.5   | 41.1  | 3.3   | 1   | 7.1  | 1.00  | 0.83   | 0.75     | 0.83    | 1.00   | 1.00             | 5.4        |
| Candidate-035 | Candidates | Calcium Channels    | 185.3 | -0.2  | 63.3  | -0.9  | 3   | 10.3 | 1.00  | 0.17   | 1.00     | 1.00    | 1.00   | 0.00             | 4.2        |
| Candidate-036 | Candidates | Peptide GPCR        | 326.5 | 7.6   | 34.2  | 7.1   | 1   | 7.2  | 1.00  | 0.83   | 0.00     | 0.00    | 0.71   | 1.00             | 3.5        |

Moving Beyond Rules: The Development of a Central Nervous System Multi-Parameter Optimization (CNS MPO) Approach to Enable Alignment of Drug-Like Properties

Travis T. Wager, *et. al*

| Pub-Name      | Set        | Target Mechanism    | MW    | CLOGP | TPSA  | CLOGD | HBD | PKA  | T0_MW | T0_HBD | T0_CLOGP | T0_LOGD | T0_PSA | T0_BASIC1 PKA | CNS MPO |
|---------------|------------|---------------------|-------|-------|-------|-------|-----|------|-------|--------|----------|---------|--------|---------------|---------|
| Candidate-037 | Candidates | Gaba Receptors      | 324.3 | 2.5   | 74.3  | -2.8  | 2   | 12.4 | 1.00  | 0.50   | 1.00     | 1.00    | 1.00   | 0.00          | 4.5     |
| Candidate-038 | Candidates | Serotonergic GPCR   | 417.5 | 5.1   | 26.8  | 3.6   | 0   | 7.8  | 0.59  | 1.00   | 0.00     | 0.20    | 0.34   | 1.00          | 3.1     |
| Candidate-039 | Candidates | Glutamate receptors | 462.9 | 5.6   | 51.0  | 4.0   | 0   | 8.5  | 0.26  | 1.00   | 0.00     | 0.00    | 1.00   | 0.77          | 3.0     |
| Candidate-040 | Candidates | Enzyme              | 395.5 | -1.5  | 101.8 | -0.7  | 1   | 7.9  | 0.75  | 0.83   | 1.00     | 1.00    | 0.61   | 1.00          | 5.2     |
| Candidate-041 | Candidates | Peptide GPCR        | 380.4 | 4.6   | 42.5  | 1.9   | 2   | 9.9  | 0.85  | 0.50   | 0.20     | 1.00    | 1.00   | 0.08          | 3.6     |
| Candidate-042 | Candidates | Serotonergic GPCR   | 304.8 | 2.9   | 50.3  | 2.8   | 1   | 7.4  | 1.00  | 0.83   | 1.00     | 0.60    | 1.00   | 1.00          | 5.4     |
| Candidate-043 | Candidates | Peptide GPCR        | 394.9 | 2.1   | 50.1  | 0.7   | 0   | 8.7  | 0.75  | 1.00   | 1.00     | 1.00    | 1.00   | 0.67          | 5.4     |
| Candidate-044 | Candidates | Serotonergic GPCR   | 355.4 | 3.3   | 37.4  | 2.5   | 1   | 8.2  | 1.00  | 0.83   | 0.84     | 0.77    | 0.87   | 0.92          | 5.2     |
| Candidate-045 | Candidates | Cannabinoids        | 510.4 | 4.1   | 102.0 | 2.7   | 3   | 7.0  | 0.00  | 0.17   | 0.46     | 0.26    | 0.60   | 1.00          | 2.5     |
| Candidate-046 | Candidates | Serotonergic GPCR   | 448.4 | 5.7   | 26.8  | 4.8   | 0   | 7.7  | 0.37  | 1.00   | 0.00     | 0.00    | 0.34   | 1.00          | 2.7     |
| Candidate-047 | Candidates | Calcium Channels    | 187.3 | 0.1   | 63.3  | -0.2  | 3   | 10.3 | 1.00  | 0.17   | 1.00     | 1.00    | 1.00   | 0.00          | 4.2     |
| Candidate-048 | Candidates | Dopaminergic GPCR   | 430.5 | 5.2   | 57.7  | 4.8   | 1   | 7.1  | 0.50  | 0.83   | 0.00     | 0.00    | 1.00   | 1.00          | 3.3     |
| Candidate-049 | Candidates | Serotonergic GPCR   | 455.0 | 5.7   | 48.5  | 3.5   | 1   | 8.4  | 0.32  | 0.83   | 0.00     | 0.27    | 1.00   | 0.80          | 3.2     |
| Candidate-050 | Candidates | Gaba Receptors      | 373.4 | 2.5   | 83.2  | -0.1  | 3   | 9.3  | 0.90  | 0.17   | 1.00     | 1.00    | 1.00   | 0.35          | 4.4     |
| Candidate-051 | Candidates | Reuptake Inhibitors | 363.3 | 3.7   | 48.3  | 1.9   | 1   | 8.3  | 0.98  | 0.83   | 0.65     | 1.00    | 1.00   | 0.87          | 5.3     |
| Candidate-052 | Candidates | Enzyme              | 385.3 | 3.1   | 52.2  | 5.0   | 1   | 1.0  | 0.82  | 0.83   | 0.94     | 0.00    | 1.00   | 1.00          | 4.6     |
| Candidate-053 | Candidates | Nicotinic Receptor  | 227.2 | 2.6   | 12.0  | -0.2  | 1   | 10.0 | 1.00  | 0.83   | 1.00     | 1.00    | 0.00   | 0.03          | 3.9     |
| Candidate-054 | Candidates | Opioid Receptor     | 319.5 | 6.4   | 3.2   | 5.3   | 0   | 8.6  | 1.00  | 1.00   | 0.00     | 0.00    | 0.00   | 0.72          | 2.7     |
| Candidate-055 | Candidates | Enzyme              | 388.5 | 5.1   | 34.5  | 2.6   | 0   | 8.8  | 0.80  | 1.00   | 0.00     | 0.69    | 0.72   | 0.61          | 3.8     |
| Candidate-056 | Candidates | Enzyme              | 392.5 | 3.8   | 52.8  | 3.5   | 0   | 4.3  | 0.77  | 1.00   | 0.58     | 0.24    | 1.00   | 1.00          | 4.6     |
| Candidate-057 | Candidates | Dopaminergic GPCR   | 391.5 | 4.3   | 39.5  | 4.7   | 0   | 7.3  | 0.78  | 1.00   | 0.36     | 0.00    | 0.98   | 1.00          | 4.1     |
| Candidate-058 | Candidates | Peptide GPCR        | 614.7 | 6.0   | 149.6 | 2.2   | 5   | 1.0  | 0.00  | 0.00   | 0.00     | 0.91    | 0.00   | 1.00          | 1.9     |
| Candidate-059 | Candidates | Dopaminergic GPCR   | 480.9 | 4.9   | 61.5  | 5.8   | 1   | 6.7  | 0.14  | 0.83   | 0.04     | 0.00    | 1.00   | 1.00          | 3.0     |
| Candidate-060 | Candidates | Serotonergic GPCR   | 464.6 | 5.3   | 45.0  | 1.5   | 0   | 9.7  | 0.25  | 1.00   | 0.00     | 1.00    | 1.00   | 0.18          | 3.4     |
| Candidate-061 | Candidates | Histaminergic GPCR  | 350.4 | 3.4   | 32.3  | 0.9   | 1   | 9.2  | 1.00  | 0.83   | 0.82     | 1.00    | 0.62   | 0.42          | 4.7     |
| Candidate-062 | Candidates | Dopaminergic GPCR   | 433.5 | 4.9   | 44.8  | 3.3   | 1   | 6.8  | 0.47  | 0.83   | 0.06     | 0.34    | 1.00   | 1.00          | 3.7     |
| Candidate-063 | Candidates | Nicotinic Receptor  | 288.3 | 1.7   | 50.8  | -0.7  | 1   | 9.7  | 1.00  | 0.83   | 1.00     | 1.00    | 1.00   | 0.13          | 5.0     |
| Candidate-064 | Candidates | Serotonergic GPCR   | 275.7 | 3.7   | 21.3  | 1.4   | 1   | 9.0  | 1.00  | 0.83   | 0.63     | 1.00    | 0.06   | 0.49          | 4.0     |
| Candidate-065 | Candidates | Peptide GPCR        | 417.3 | 6.2   | 63.0  | 3.8   | 2   | 6.3  | 0.59  | 0.50   | 0.00     | 0.08    | 1.00   | 1.00          | 3.2     |
| Candidate-066 | Candidates | Serotonergic GPCR   | 436.6 | 3.3   | 59.9  | 2.2   | 1   | 7.8  | 0.45  | 0.83   | 0.84     | 0.91    | 1.00   | 1.00          | 5.0     |
| Candidate-067 | Candidates | Dopaminergic GPCR   | 463.5 | 5.4   | 69.7  | 4.3   | 2   | 6.8  | 0.26  | 0.50   | 0.00     | 0.00    | 1.00   | 1.00          | 2.8     |

Moving Beyond Rules: The Development of a Central Nervous System Multi-Parameter Optimization (CNS MPO) Approach to Enable Alignment of Drug-Like Properties

Travis T. Wager, *et. al*

| Pub-Name      | Set        | Target Mechanism    | MW    | CLOGP | TPSA  | CLOGD | HBD | PKA  | T0_MW | T0_HBD | T0_CLOGP | T0_LOGD | T0_PSA | T0_BASIC1<br>PKA | CNS<br>MPO |
|---------------|------------|---------------------|-------|-------|-------|-------|-----|------|-------|--------|----------|---------|--------|------------------|------------|
| Candidate-068 | Candidates | Serotonergic GPCR   | 469.0 | 6.2   | 48.5  | 4.8   | 1   | 8.4  | 0.22  | 0.83   | 0.00     | 0.00    | 1.00   | 0.80             | 2.8        |
| Candidate-069 | Candidates | Reuptake Inhibitors | 300.2 | 5.1   | 21.3  | 3.4   | 1   | 9.0  | 1.00  | 0.83   | 0.00     | 0.33    | 0.06   | 0.48             | 2.7        |
| Candidate-070 | Candidates | Dopaminergic GPCR   | 221.3 | 1.3   | 42.2  | 1.1   | 2   | 7.0  | 1.00  | 0.50   | 1.00     | 1.00    | 1.00   | 1.00             | 5.5        |
| Candidate-071 | Candidates | Reuptake Inhibitors | 376.9 | 1.7   | 41.4  | -0.9  | 0   | 10.1 | 0.88  | 1.00   | 1.00     | 1.00    | 1.00   | 0.00             | 4.9        |
| Candidate-072 | Candidates | Dopaminergic GPCR   | 360.4 | 3.1   | 41.5  | 4.1   | 0   | 7.8  | 1.00  | 1.00   | 0.97     | 0.00    | 1.00   | 1.00             | 5.0        |
| Candidate-073 | Candidates | Gaba Receptors      | 323.3 | 2.2   | 84.1  | 4.1   | 2   | 1.0  | 1.00  | 0.50   | 1.00     | 0.00    | 1.00   | 1.00             | 4.5        |
| Candidate-074 | Candidates | Peptide GPCR        | 327.5 | 7.6   | 31.4  | 6.2   | 0   | 5.6  | 1.00  | 1.00   | 0.00     | 0.00    | 0.57   | 1.00             | 3.6        |
| Candidate-075 | Candidates | Nicotinic Receptor  | 271.3 | 1.7   | 58.4  | -1.2  | 1   | 9.5  | 1.00  | 0.83   | 1.00     | 1.00    | 1.00   | 0.23             | 5.1        |
| Candidate-076 | Candidates | Nicotinic Receptor  | 258.3 | 1.6   | 45.4  | 0.4   | 0   | 8.9  | 1.00  | 1.00   | 1.00     | 1.00    | 1.00   | 0.57             | 5.6        |
| Candidate-077 | Candidates | Gaba Receptors      | 316.3 | 2.0   | 71.2  | 1.4   | 2   | 1.0  | 1.00  | 0.50   | 1.00     | 1.00    | 1.00   | 1.00             | 5.5        |
| Candidate-078 | Candidates | Reuptake Inhibitors | 335.3 | 2.9   | 39.7  | 1.5   | 1   | 8.3  | 1.00  | 0.83   | 1.00     | 1.00    | 0.99   | 0.86             | 5.7        |
| Candidate-079 | Candidates | Calcium Channels    | 187.3 | 0.2   | 63.3  | 0.0   | 3   | 10.5 | 1.00  | 0.17   | 1.00     | 1.00    | 1.00   | 0.00             | 4.2        |
| Candidate-080 | Candidates | Dopaminergic GPCR   | 367.4 | 3.0   | 65.3  | 3.4   | 0   | 7.2  | 0.95  | 1.00   | 1.00     | 0.30    | 1.00   | 1.00             | 5.2        |
| Candidate-081 | Candidates | Serotonergic GPCR   | 382.5 | 2.8   | 39.7  | 2.3   | 0   | 7.2  | 0.84  | 1.00   | 1.00     | 0.86    | 0.98   | 1.00             | 5.7        |
| Candidate-082 | Candidates | Gaba Receptors      | 297.4 | 1.2   | 74.0  | -1.9  | 3   | 9.6  | 1.00  | 0.17   | 1.00     | 1.00    | 1.00   | 0.21             | 4.4        |
| Candidate-083 | Candidates | Cannabinoids        | 452.3 | 5.8   | 47.4  | 5.1   | 0   | 1.0  | 0.34  | 1.00   | 0.00     | 0.00    | 1.00   | 1.00             | 3.3        |
| Candidate-084 | Candidates | Gaba Receptors      | 360.4 | 2.6   | 72.3  | 3.1   | 0   | 4.0  | 1.00  | 1.00   | 1.00     | 0.43    | 1.00   | 1.00             | 5.4        |
| Candidate-085 | Candidates | Reuptake Inhibitors | 294.4 | 3.2   | 52.6  | 1.5   | 1   | 8.4  | 1.00  | 0.83   | 0.88     | 1.00    | 1.00   | 0.81             | 5.5        |
| Candidate-086 | Candidates | Muscarinic Receptor | 270.3 | 2.5   | 34.1  | 3.9   | 0   | 5.5  | 1.00  | 1.00   | 1.00     | 0.07    | 0.70   | 1.00             | 4.8        |
| Candidate-087 | Candidates | Cannabinoids        | 496.4 | 4.3   | 101.4 | 2.2   | 3   | 5.7  | 0.03  | 0.17   | 0.37     | 0.90    | 0.62   | 1.00             | 3.1        |
| Candidate-088 | Candidates | Dopaminergic GPCR   | 357.8 | 3.5   | 44.8  | 2.3   | 1   | 5.8  | 1.00  | 0.83   | 0.75     | 0.86    | 1.00   | 1.00             | 5.4        |
| Candidate-089 | Candidates | Enzyme              | 271.4 | 2.2   | 60.2  | 0.3   | 3   | 9.4  | 1.00  | 0.17   | 1.00     | 1.00    | 1.00   | 0.33             | 4.5        |
| Candidate-090 | Candidates | Glutamate receptors | 359.4 | 1.6   | 73.2  | 1.1   | 3   | 6.8  | 1.00  | 0.17   | 1.00     | 1.00    | 1.00   | 1.00             | 5.2        |
| Candidate-091 | Candidates | Gaba Receptors      | 330.4 | 2.5   | 71.2  | 2.0   | 2   | 1.0  | 1.00  | 0.50   | 1.00     | 1.00    | 1.00   | 1.00             | 5.5        |
| Candidate-092 | Candidates | Reuptake Inhibitors | 360.3 | 3.1   | 50.2  | 0.6   | 1   | 8.1  | 1.00  | 0.83   | 0.95     | 1.00    | 1.00   | 0.97             | 5.7        |
| Candidate-093 | Candidates | Muscarinic Receptor | 269.2 | 5.2   | 15.6  | 2.3   | 0   | 7.3  | 1.00  | 1.00   | 0.00     | 0.88    | 0.00   | 1.00             | 3.9        |
| Candidate-094 | Candidates | Dopaminergic GPCR   | 420.5 | 4.9   | 44.3  | 3.7   | 1   | 7.8  | 0.57  | 0.83   | 0.05     | 0.17    | 1.00   | 1.00             | 3.6        |
| Candidate-095 | Candidates | Gaba Receptors      | 321.3 | 2.9   | 68.5  | 0.9   | 1   | 2.1  | 1.00  | 0.83   | 1.00     | 1.00    | 1.00   | 1.00             | 5.8        |
| Candidate-096 | Candidates | Serotonergic GPCR   | 419.6 | 4.1   | 47.0  | 2.3   | 1   | 7.8  | 0.57  | 0.83   | 0.46     | 0.87    | 1.00   | 1.00             | 4.7        |
| Candidate-097 | Candidates | Reuptake Inhibitors | 309.8 | 4.9   | 30.5  | 3.1   | 1   | 8.6  | 1.00  | 0.83   | 0.06     | 0.44    | 0.52   | 0.72             | 3.6        |
| Candidate-098 | Candidates | Enzyme              | 460.5 | 4.1   | 52.8  | 4.8   | 0   | 4.1  | 0.28  | 1.00   | 0.43     | 0.00    | 1.00   | 1.00             | 3.7        |

| Pub-Name      | Set        | Target Mechanism   | MW    | CLOGP | TPSA  | CLOGD | HBD | PKA  | T0_MW | T0_HBD | T0_CLOGP | T0_LOGD | T0_PSA | T0_BASIC1<br>PKA | CNS<br>MPO |
|---------------|------------|--------------------|-------|-------|-------|-------|-----|------|-------|--------|----------|---------|--------|------------------|------------|
| Candidate-099 | Candidates | Peptide GPCR       | 412.6 | 5.6   | 24.5  | 3.5   | 1   | 10.0 | 0.62  | 0.83   | 0.00     | 0.27    | 0.23   | 0.00             | 2.0        |
| Candidate-100 | Candidates | Enzyme             | 400.3 | 8.6   | 49.3  | 5.4   | 2   | 1.0  | 0.71  | 0.50   | 0.00     | 0.00    | 1.00   | 1.00             | 3.2        |
| Candidate-101 | Candidates | Dopaminergic GPCR  | 434.6 | 5.2   | 48.5  | 3.7   | 1   | 8.4  | 0.47  | 0.83   | 0.00     | 0.14    | 1.00   | 0.80             | 3.2        |
| Candidate-102 | Candidates | Serotonergic GPCR  | 450.6 | 4.1   | 69.9  | 3.7   | 0   | 8.0  | 0.35  | 1.00   | 0.48     | 0.16    | 1.00   | 1.00             | 4.0        |
| Candidate-103 | Candidates | Dopaminergic GPCR  | 329.5 | 6.4   | 3.2   | 5.0   | 0   | 8.4  | 1.00  | 1.00   | 0.00     | 0.00    | 0.00   | 0.83             | 2.8        |
| Candidate-104 | Candidates | Peptide GPCR       | 419.6 | 3.2   | 53.6  | 1.2   | 2   | 9.9  | 0.57  | 0.50   | 0.88     | 1.00    | 1.00   | 0.03             | 4.0        |
| Candidate-105 | Candidates | Gaba Receptors     | 298.3 | 2.4   | 71.2  | 1.5   | 2   | 1.3  | 1.00  | 0.50   | 1.00     | 1.00    | 1.00   | 1.00             | 5.5        |
| Candidate-106 | Candidates | Peptide GPCR       | 493.6 | 5.8   | 103.5 | 4.6   | 4   | 1.0  | 0.05  | 0.00   | 0.00     | 0.00    | 0.55   | 1.00             | 1.6        |
| Candidate-107 | Candidates | Calcium Channels   | 173.3 | -0.3  | 63.3  | -0.5  | 3   | 10.5 | 1.00  | 0.17   | 1.00     | 1.00    | 1.00   | 0.00             | 4.2        |
| Candidate-108 | Candidates | Nicotinic Receptor | 209.2 | 2.5   | 12.0  | 0.2   | 1   | 10.1 | 1.00  | 0.83   | 1.00     | 1.00    | 0.00   | 0.00             | 3.8        |
